# Supplementary material for: Nutritional Controlled Preparation and Administration of Different Tomato Purées Indicate Increase of β-Carotene and Lycopene Isoforms, and of Antioxidant Potential in Human Blood Bioavailability: A Pilot Study
Source: MDPI journal article supplement (doi:10.3390/nu13041336), 2021-04-17
Supplement: s1 [file s1]

Nutritional Controlled Preparation and Administration of Different Tomato Purées Indicate Increase of β-Carotene and Lycopene Isoforms, and of Antioxidant Potential in Human Blood Bioavailability: A Pilot Study

Daniela Vitucci <sup>1,†</sup>, Angela Amoresano <sup>2,†</sup>, Marcella Nunziato <sup>1,3,†</sup>, Simona Muoio <sup>4</sup>, Andreina Alfieri <sup>1,5</sup>, Giovannangelo Oriani <sup>1</sup>, Luca Scalfi <sup>6</sup>, Luigi Frusciante <sup>7</sup>, Maria Manuela Rigano <sup>7</sup>, Piero Pucci <sup>1,2</sup>, Luigi Fontana <sup>8</sup>, Pasqualina Buono <sup>1,5,\*</sup> and Francesco Salvatore <sup>1,3,\*</sup>

**Table S1. Lycopene’s isoform estimation from T0 to T5.** The table shows the mean ± SD values for *trans*- and *cis*- lycopene concentrations analyzed in triplicate in baseline blood withdrawal at (T0) and following test-meal consumption at T1, T2, T3, T4 and after 5 days of sauces chronic consumption (T5).

| Trans- Lycopene (µg/mL/plasma) |            |                       |            |            |            |            |            |                         |            |            |            |            |            |
|--------------------------------|------------|-----------------------|------------|------------|------------|------------|------------|-------------------------|------------|------------|------------|------------|------------|
| Subject                        | T0         |                       | T1         | T2         | T3         | T4         | T5         |                         | T1         | T2         | T3         | T4         | T5         |
| 1                              | 15.1 ± 0.9 | Rustic Tomatoes sauce | 31.1 ± 0.5 | 25.6 ± 0.3 | 13.4 ± 0.7 | 6.5 ± 0.7  | 7.6 ± 0.7  | Strained Tomatoes sauce | 53.5 ± 0.9 | 34.5 ± 1.1 | 31.2 ± 0.9 | 12.1 ± 0.6 | 15.4 ± 0.5 |
| 2                              | 13.7 ± 0.6 |                       | 25.6 ± 0.7 | 19.6 ± 0.5 | 11.7 ± 1.7 | 5.4 ± 1.2  | 8.0 ± 1.2  |                         | 60.8 ± 0.4 | 25.6 ± 0.6 | 21.3 ± 1.1 | 13.5 ± 0.8 | 13.9 ± 1.0 |
| 3                              | 10.3 ± 1.2 |                       | 34.6 ± 0.6 | 20.2 ± 2.0 | 14.3 ± 0.5 | 7.6 ± 0.6  | 4.6 ± 0.5  |                         | 65.4 ± 0.7 | 27.7 ± 0.3 | 28.9 ± 0.4 | 14.3 ± 0.9 | 13.2 ± 0.4 |
| 4                              | 14.3 ± 0.6 |                       | 24.9 ± 0.7 | 18.1 ± 1.3 | 12.0 ± 0.7 | 6.2 ± 1.7  | 5.2 ± 1.3  |                         | 60.2 ± 0.5 | 24.6 ± 0.9 | 20.1 ± 2.2 | 11.6 ± 1.0 | 7.9 ± 0.9  |
| 5                              | 17.2 ± 0.8 |                       | 28.1 ± 2.3 | 18.8 ± 2.0 | 12.7 ± 1.1 | 8.1 ± 1.4  | 7.2 ± 1.0  |                         | 72.1 ± 0.7 | 31.2 ± 1.4 | 15.6 ± 0.8 | 10.9 ± 0.6 | 19.4 ± 0.5 |
| 6                              | 13.4 ± 1.0 |                       | 30.3 ± 1.0 | 24.9 ± 1.5 | 16.6 ± 0.8 | 14.1 ± 1.2 | 10.3 ± 1.0 |                         | 61.2 ± 0.4 | 30.2 ± 0.6 | 18.4 ± 0.5 | 12.1 ± 0.8 | 9.7 ± 0.7  |
| 7                              | 11.3 ± 1.2 |                       | 33.2 ± 1.0 | 29.4 ± 1.0 | 15.6 ± 0.6 | 5.4 ± 0.8  | 7.4 ± 0.8  |                         | 54.1 ± 0.1 | 36.1 ± 1.2 | 30.6 ± 0.6 | 15.4 ± 0.4 | 17.5 ± 0.3 |
| 8                              | 15.2 ± 1.5 |                       | 34.1 ± 1.5 | 32.1 ± 3.1 | 11.2 ± 1.9 | 5.1 ± 2.9  | 5.6 ± 0.6  |                         | 56.3 ± 0.4 | 38.5 ± 0.4 | 25.6 ± 0.4 | 11.3 ± 0.4 | 21.5 ± 0.7 |
| 9                              | 10.3 ± 0.9 |                       | 30.2 ± 1.4 | 36.2 ± 1.0 | 14.2 ± 1.3 | 4.6 ± 0.7  | 4.6 ± 0.5  |                         | 50.3 ± 0.7 | 41.3 ± 0.6 | 28.6 ± 0.4 | 18.4 ± 0.3 | 21.4 ± 0.3 |
| 10                             | 13.3 ± 0.6 |                       | 28.6 ± 1.3 | 33.4 ± 1.0 | 12.3 ± 1.1 | 2.3 ± 1.1  | 5.1 ± 1.0  |                         | 48.4 ± 0.4 | 47.1 ± 0.6 | 31.5 ± 0.3 | 21.3 ± 0.5 | 22.4 ± 0.4 |
| Cis- Lycopene (µg/mL/plasma)   |            |                       |            |            |            |            |            |                         |            |            |            |            |            |
| Subject                        | T0         |                       | T1         | T2         | T3         | T4         | T5         |                         | T1         | T2         | T3         | T4         | T5         |
| 1                              | 2.1 ± 0.7  | Rustic Tomatoes sauce | 20.6 ± 0.6 | 11.9 ± 0.2 | 1.3 ± 0.7  | 0.5 ± 0.3  | 1.0 ± 0.7  | Strained Tomatoes sauce | 21.2 ± 1.5 | 8.1 ± 1.2  | 4.7 ± 0.6  | 5.9 ± 0.3  | 8.7 ± 1.7  |
| 2                              | 1.9 ± 0.4  |                       | 16.6 ± 0.5 | 7.4 ± 0.7  | 3.4 ± 0.9  | 0.8 ± 0.4  | 1.0 ± 0.7  |                         | 32.8 ± 0.7 | 6.2 ± 1.1  | 1.7 ± 0.4  | 7.9 ± 0.6  | 4.4 ± 0.8  |
| 3                              | 1.5 ± 0.4  |                       | 18.4 ± 1.1 | 9.4 ± 1.1  | 1.8 ± 0.6  | 0.6 ± 0.4  | 1.0 ± 0.8  |                         | 25.6 ± 1.2 | 9.1 ± 0.8  | 6.4 ± 0.7  | 5.7 ± 0.5  | 9.1 ± 0.6  |
| 4                              | 2.1 ± 0.4  |                       | 14.6 ± 1.0 | 10.2 ± 1.8 | 4.3 ± 1.1  | 1.3 ± 0.7  | 1.0 ± 1.0  |                         | 21.6 ± 1.2 | 8.1 ± 0.5  | 4.3 ± 0.8  | 4.9 ± 0.9  | 4.2 ± 0.3  |
| 5                              | 2.3 ± 0.5  |                       | 8.4 ± 0.8  | 7.1 ± 1.2  | 2.9 ± 0.6  | 0.8 ± 0.4  | 0.7 ± 0.6  |                         | 17.1 ± 0.8 | 11.8 ± 1.0 | 7.2 ± 0.7  | 3.4 ± 1.2  | 2.6 ± 0.4  |
| 6                              | 2.1 ± 1.6  |                       | 12.7 ± 0.8 | 8.4 ± 0.9  | 3.8 ± 0.4  | 3.2 ± 1.2  | 2.0 ± 1.3  |                         | 15.6 ± 0.4 | 7.6 ± 0.8  | 6.1 ± 0.7  | 4.6 ± 0.7  | 3.1 ± 0.4  |
| 7                              | 1.4 ± 1.0  |                       | 21.6 ± 0.8 | 14.2 ± 1.2 | 2.4 ± 0.8  | 1.2 ± 0.7  | 0.5 ± 0.3  |                         | 23.6 ± 0.6 | 10.2 ± 0.6 | 6.4 ± 0.7  | 4.6 ± 0.3  | 10.3 ± 0.2 |
| 8                              | 1.1 ± 0.6  |                       | 26.8 ± 1.5 | 17.4 ± 1.1 | 1.3 ± 0.9  | 1.1 ± 0.2  | 0.7 ± 0.4  |                         | 19.8 ± 0.4 | 8.4 ± 0.4  | 5.7 ± 0.5  | 5.9 ± 0.3  | 4.7 ± 0.5  |
| 9                              | 2.3 ± 0.9  |                       | 25.4 ± 0.6 | 18.2 ± 1.5 | 1.0 ± 0.5  | 1.6 ± 0.5  | 0.9 ± 0.2  |                         | 18.7 ± 0.5 | 11.2 ± 0.8 | 5.4 ± 0.4  | 3.6 ± 0.3  | 11.3 ± 0.3 |
| 10                             | 3.1 ± 1.2  |                       | 21.4 ± 0.9 | 14.5 ± 0.7 | 0.5 ± 0.2  | 1.0 ± 0.6  | 1.1 ± 0.9  |                         | 21.6 ± 0.3 | 18.4 ± 0.3 | 4.7 ± 0.5  | 4.5 ± 0.3  | 21.3 ± 0.3 |

**Table S2. *Trans*- and *Cis*-lycopene plasma concentration.** Time-course (mean  $\pm$  DS value) of *trans*- and *cis*-lycopene plasma concentration after meal consumption (see Fig. 2B).

|                                                                         | Time after meal<br>intake | Rustic tomatoes<br>sauce | Strained tomatoes<br>sauce | <i>p</i> -value |
|-------------------------------------------------------------------------|---------------------------|--------------------------|----------------------------|-----------------|
| <b><i>Trans</i> - Lycopene<br/>(<math>\mu\text{g/mL/plasma}</math>)</b> | T1 2h                     | 30.1 $\pm$ 3.3           | 58.2 $\pm$ 7.2             | < 0.001         |
|                                                                         | T2 4h                     | 25.8 $\pm$ 6.6           | 33.7 $\pm$ 7.2             | < 0.05          |
|                                                                         | T3 6h                     | 13.4 $\pm$ 1.8           | 25.2 $\pm$ 5.9             | < 0.001         |
|                                                                         | T4 24h                    | 6.5 $\pm$ 3.1            | 14.1 $\pm$ 3.4             | < 0.001         |
| <b><i>Cis</i> - Lycopene<br/>(<math>\mu\text{g/mL/plasma}</math>)</b>   | T1 2h                     | 21.7 $\pm$ 4.9           | 18.6 $\pm$ 5.7             | > 0.05          |
|                                                                         | T2 4h                     | 10.0 $\pm$ 3.4           | 11.9 $\pm$ 4.0             | > 0.05          |
|                                                                         | T3 6h                     | 5.3 $\pm$ 1.5            | 2.3 $\pm$ 1.3              | < 0.001         |
|                                                                         | T4 24h                    | 5.1 $\pm$ 1.5            | 1.2 $\pm$ 0.8              | < 0.001         |

**Table S3. *Trans*- and *Cis*-lycopene plasma concentration in chronic phase consumption.** Mean values  $\pm$  DS of *trans*- and *cis*- plasma lycopene concentration after 5 days consumption of two different sauces (see Figure 3 A).

|                                                                         | Time after meal<br>intake | Rustic tomatoes<br>sauce | Strained tomatoes<br>sauce | <i>p</i> -value |
|-------------------------------------------------------------------------|---------------------------|--------------------------|----------------------------|-----------------|
| <b><i>Trans</i> - Lycopene<br/>(<math>\mu\text{g/mL/plasma}</math>)</b> | T5                        | 6.6 $\pm$ 1.8            | 16.2 $\pm$ 5.1             | < 0.001         |
| <b><i>Cis</i> - Lycopene<br/>(<math>\mu\text{g/mL/plasma}</math>)</b>   | T5                        | 1.0 $\pm$ 0.4            | 8.0 $\pm$ 5.6              | < 0.001         |
